# Supplementary material
Source: publisher figshare collection journal article supplement (https://acs.figshare.com/ndownloader/files/14442461)
Supplement: Supplementary file 1 [file 14442461]

# Supporting Information

Surface morphology and sulfur reduction pathways of MoS<sub>2</sub> Mo-edges of monolayer, (100) and (103) surfaces by molecular hydrogen: A DFT study

Sergei Posysaev, Matti Alatalo\*

Nano and Molecular Systems Research Unit, University of Oulu, P.O. Box 3000, FI-90014, Finland

\*Corresponding author.

E-mail: [matti.alatalo@oulu.fi](mailto:matti.alatalo@oulu.fi)

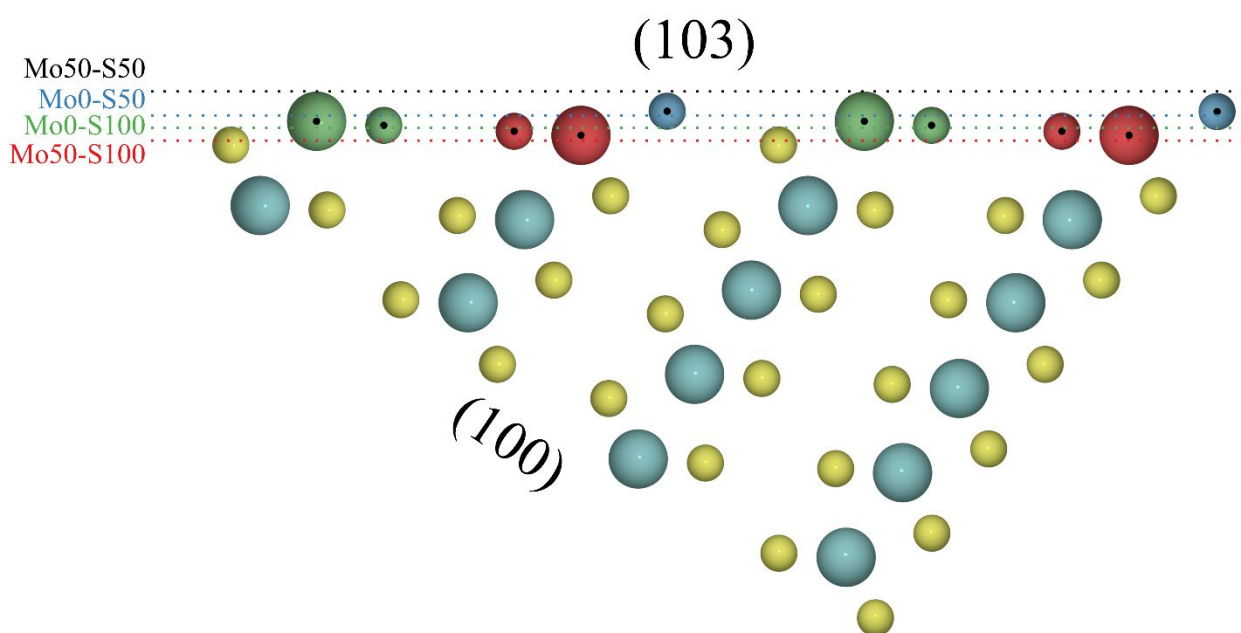

**Figure S1.** Planar terminations of the  $\text{MoS}_2$  (103) surface. Black dots indicate the center of atoms. The Mo50-S50 termination includes all atoms. The Mo0-S50 termination is created by removing the sulfur atoms shown in blue. The Mo0-S100 termination is created by removing the molybdenum and sulfur atoms shown in green. The Mo50-S100 termination is created by removing the molybdenum and sulfur atoms shown in red.
